# Supplementary material for: Factors of COVID-19 Vaccination among Hong Kong Chinese Men Who Have Sex with Men during Months 5–8 since the Vaccine Rollout—General Factors and Factors Specific to This Population
Source: MDPI journal article supplement (doi:10.3390/vaccines10101763), 2022-10-20
Supplement: s1 [file s1]

## Supplementary Material

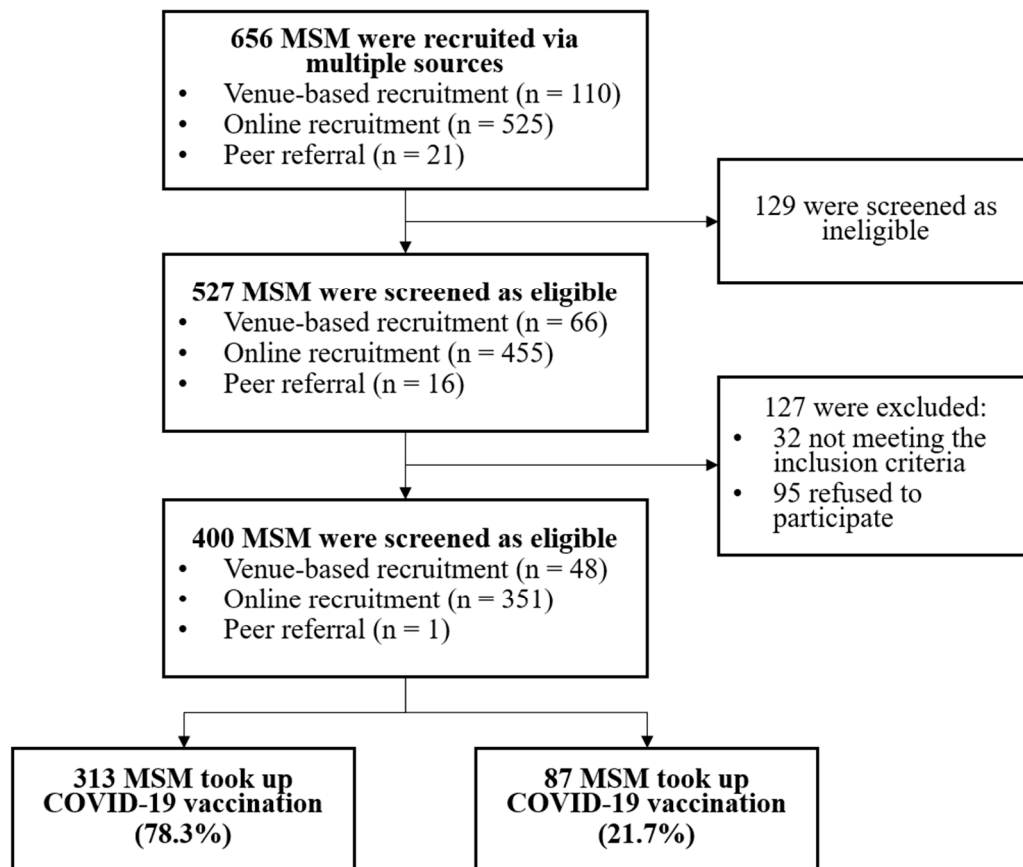

Figure S1. Flowchart of participant recruitment

Table S1 Descriptive statistics and associations between the independent variables and COVID-19 vaccination behavior

|                                                         | Range | Overall<br>Median<br>(IQR) | COVID-19 vaccination behavior |              |                 |              | <i>p</i> | <i>r</i> |
|---------------------------------------------------------|-------|----------------------------|-------------------------------|--------------|-----------------|--------------|----------|----------|
|                                                         |       |                            | Yes                           |              | No              |              |          |          |
|                                                         |       |                            | Median<br>(IQR)               | Mean<br>rank | Median<br>(IQR) | Mean<br>rank |          |          |
| <b>General HBM constructs</b>                           |       |                            |                               |              |                 |              |          |          |
| Perceived Severity Scale (PSEV-G)                       | 0-10  | 6.0 (4.5-7.5)              | 5.5 (4.0-7.0)                 | 199.3        | 6.0 (3.5-7.5)   | 204.7        | 0.698    | 0.04     |
| Perceived benefits (PBEN-G)                             | 1-5   | 4.0 (3.0-4.0)              | 3.0 (3.0-3.0)                 | 222.5        | 3.0 (2.0-3.0)   | 121.5        | <0.001   | 0.81     |
| Perceived barriers (PBAR-G)                             |       |                            |                               |              |                 |              |          |          |
| Insufficient understanding about side effects (PBAR1-G) | 1-5   | 2.0 (1.0-3.0)              | 2.0 (1.0-2.0)                 | 190.0        | 2.0 (1.0-3.0)   | 238.2        | <0.001   | 0.36     |
| Unacceptable chance of severe side effects (PBAR2-G)    | 1-5   | 2.0 (1.0-3.0)              | 1.0 (1.0-2.0)                 | 178.0        | 3.0 (2.0-3.0)   | 281.6        | <0.001   | 0.82     |
| Self-efficacy (SE-G)                                    | 1-5   | 4.0 (2.0-4.0)              | 4.0 (3.0-4.0)                 | 222.8        | 2.0 (1.0-3.0)   | 120.2        | <0.001   | 0.86     |
| <b>General social norms (SN-G)</b>                      | 1-5   | 3.0 (3.0-4.0)              | 2.0 (1.0-3.0)                 | 192.7        | 3.0 (2.0-3.0)   | 228.7        | 0.008    | 0.27     |
| <b>MSM-specific HBM constructs</b>                      |       |                            |                               |              |                 |              |          |          |
| Perceived susceptibility (PSUS-MSM)                     | 1-5   | 1.0 (1.0-3.0)              | 1.0 (1.0-2.0)                 | 205.1        | 1.0 (1.0-1.0)   | 183.9        | 0.096    | 0.17     |
| Perceived Severity Scale (PSEV-MSM)                     | 1-5   | 2.5 (2.0-3.0)              | 2.3 (1.8-2.8)                 | 200.1        | 2.3 (1.8-2.8)   | 202.1        | 0.885    | 0.02     |
| Perceived Benefit Scale (PBEN-MSM)                      | 1-5   | 2.8 (2.3-3.3)              | 2.8 (2.2-3.2)                 | 215.5        | 2.3 (1.8-2.8)   | 146.5        | <0.001   | 0.51     |
| Perceived Barriers Scale (PBAR-MSM)                     | 1-5   | 1.0 (1.0-2.0)              | 1.0 (1.0-1.5)                 | 189.4        | 1.0 (1.0-1.5)   | 240.3        | <0.001   | 0.41     |
| Cues to action (CA-MSM)                                 | 1-5   | 1.0 (1.0-2.0)              | 1.0 (1.0-1.0)                 | 204.3        | 1.0 (1.0-2.0)   | 187.0        | 0.163    | 0.14     |
| <b>MSM-specific social norms (SN-MSM)</b>               | 1-5   | 3.6 (3.0-4.0)              | 3.0 (2.0-4.0)                 | 221.9        | 2.0 (1.0-2.0)   | 123.4        | <0.001   | 0.78     |

Note. IQR = Interquartile range.  $0.1 < r < 0.3$ ,  $0.3 \leq r < 0.5$ , and  $r \geq 0.5$  representing small, medium, and large effect size, respectively.
